# Supplementary material for: Fluorescent S1 nuclease assay utilizing exponential strand displacement amplification
Source: Royal Society of Chemistry journal article supplement (doi:10.1039/c9an00300b), 2019-01-01
Supplement: c9an00300b1.pdf [file c9an00300b1.pdf]

Supporting Information for

## **Fluorescent S1 nuclease assay utilizing exponential strand displacement amplification**

By Chang Yeol Lee,<sup>a</sup> Hansol Kim,<sup>a</sup> Hyo Yong Kim,<sup>a</sup> Ki Soo Park<sup>\*b</sup> and Hyun Gyu Park<sup>\*a</sup>

<sup>a</sup>Department of Chemical and Biomolecular Engineering (BK 21+ program),  
KAIST, Daehak-ro 291, Yuseong-gu, Daejeon 34141, Republic of Korea

<sup>b</sup>Department of Biological Engineering, College of Engineering,  
Konkuk University, Seoul 05029, Republic of Korea

\* To whom correspondence should be addressed.

E-mail: hgpark@kaist.ac.kr (H.G. Park); Phone: +82-42-350-3932; Fax: +82-42-350-3910.

E-mail: kskonkuk@gmail.com (K.S. Park); Phone: +82-2-450-3742; Fax: +82-2-450-3742.

**Table S1** Comparison of this method with previous fluorescent methods for S1 nuclease.

| <b>Key material/method</b>                                              | <b>Detection limit (U/<math>\mu</math>L)</b> | <b>Limitations</b>                                                           | <b>Reference</b> |
|-------------------------------------------------------------------------|----------------------------------------------|------------------------------------------------------------------------------|------------------|
| AIE change of perylene derivative                                       | $9.2 \times 10^{-5}$                         | Synthesis of chemicals                                                       | 1                |
| AIE change of silole derivative                                         | $7.5 \times 10^{-3}$                         | Synthesis of chemicals                                                       | 2                |
| Molecular beacon labeled with fluorophore and quencher                  | $3.0 \times 10^{-3}$                         | Labeling with fluorophore and quencher                                       | 3                |
| FRET between fluorescent conjugated polymer and dsDNA-intercalating dye | $2.6 \times 10^{-6}$                         | Synthesis of chemicals                                                       | 4                |
| DNA-AgNCs as an energy acceptor in FRET                                 | $1.0 \times 10^{-3}$                         | - Labeling with fluorophore<br>- Synthesis of nanomaterials                  | 5                |
| DNA-CuNPs                                                               | $3.0 \times 10^{-4}$                         | Synthesis of nanomaterials                                                   | 6                |
| Fluorescence enhancement of DNA-AgNCs by G-rich sequence                | $1.0 \times 10^{-5}$                         | - Synthesis of nanomaterials<br>- Long assay time (120 min; 55 min for ours) | 7                |
| eSDA                                                                    | $8.7 \times 10^{-5}$                         | -                                                                            | This work        |

**Table S2** DNA sequences employed in this work.

| <b>Strand name</b> | <b>DNA sequence (5' → 3')<sup>(a,b)</sup></b>           |
|--------------------|---------------------------------------------------------|
| FP                 | AAA AAA <u>AGG ATC</u> GTG CGT CTC GGC TAG T            |
| RP                 | AAA AAA <u>AGG ATC</u> GCG GTC GGA AGC TCC T            |
| eTP                | GCG GTC GGA AGC TCC TAT GAC AAT GCA CTA GCC GAG ACG CAC |

<sup>(a)</sup> The recognition sequence for Nt.AlwI is underlined.

<sup>(b)</sup> The sequence in FP complementary to eTP is highlighted in blue while the sequence in RP identical to eTP is highlighted in red.

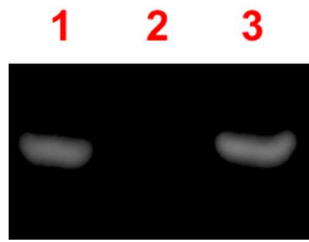

**Fig. S1** The confirmation of S1 nuclease-catalyzed degradation of eTP, where the protocols are the same with those described in 'Gel electrophoresis analysis', except that the gel was stained with GelRed. 1: w/o S1 nuclease, 2: w/ S1 nuclease, 3: w/ heat-inactivated S1 nuclease. The final concentrations of eTP and S1 nuclease are 100 nM and 2 U/ $\mu$ L, respectively, while the reaction time for S1 nuclease-catalyzed degradation is 30 min.

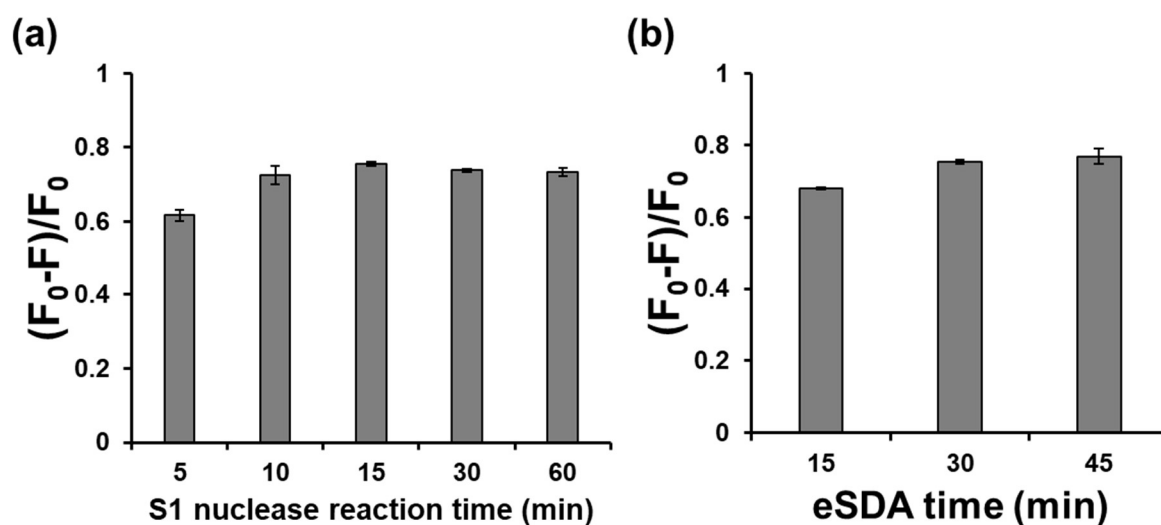

**Fig. S2** Optimization of the reaction times for S1 nuclease-catalyzed degradation and eSDA. (a) The degrees of signal change  $((F_0 - F)/F_0)$  at different times for S1 nuclease-catalyzed degradation, where  $F_0$  and  $F$  are the fluorescence intensities at 527 nm from SG I in the absence and presence of S1 nuclease, respectively. The eSDA time is 30 min. (b) The degrees of signal change at different eSDA times. The S1 nuclease-catalyzed degradation time is 15 min. The final concentrations of eTP, primers, KF, Nt.AlwI, SG I, and S1 nuclease are 50 nM, 50 nM, 60 U/mL, 120 U/mL, 1X, and 1 U/ $\mu$ L, respectively.

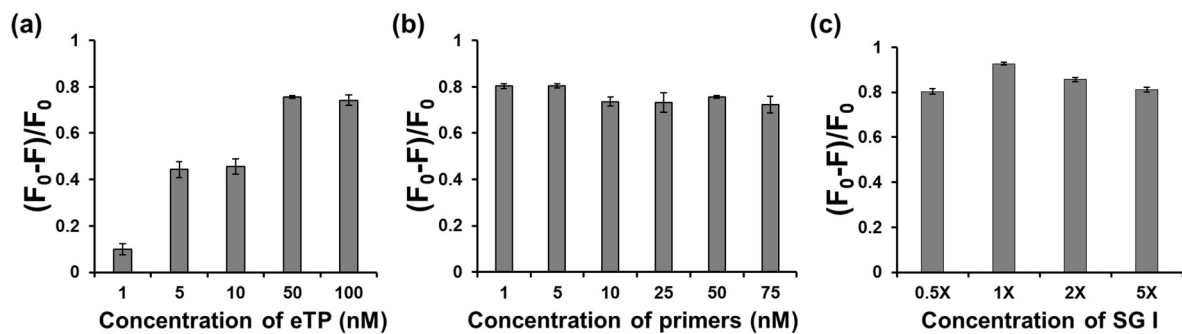

**Fig. S3** Optimization of the reaction concentrations of eTP, primers, and SG I. (a) The degrees of signal change  $((F_0 - F)/F_0)$  at different eTP concentrations, where  $F_0$  and  $F$  are the fluorescence intensities at 527 nm from SG I in the absence and presence of S1 nuclease, respectively. The final concentrations of primers and SG I are 50 nM and 1X, respectively. (b) The degrees of signal change at different concentrations of primers (FP and RP). The final concentrations of eTP and SG I are 50 nM and 1X, respectively. (c) The degrees of signal change at different SG I concentrations. The final concentrations of eTP and primers are 50 nM and 5 nM, respectively. The final concentration of S1 nuclease is 1 U/ $\mu$ L.

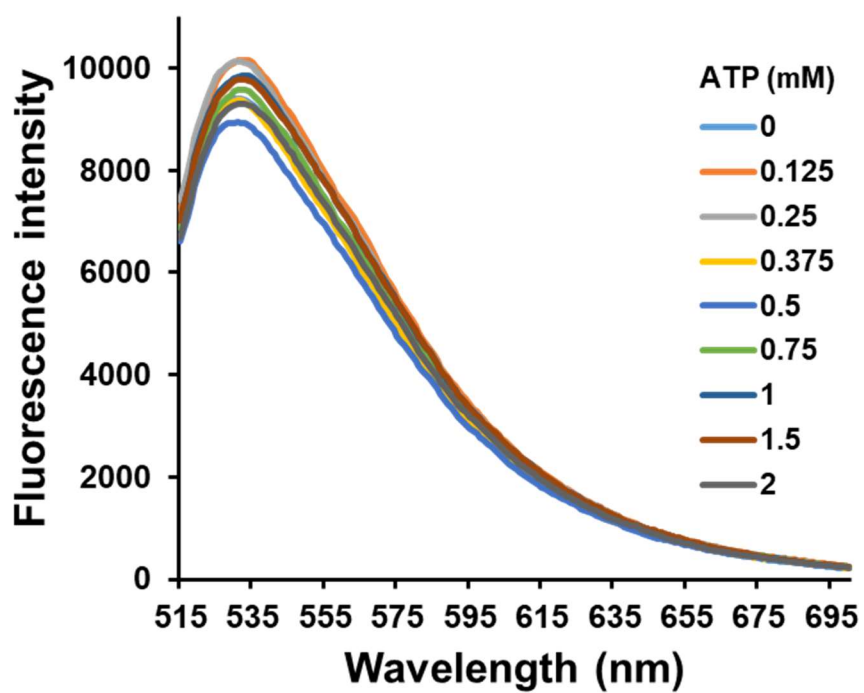

**Fig. S4** The direct effect of ATP on eSDA. The fluorescence emission spectra from SG I after eSDA executed in the presence of varying concentrations of ATP without S1 nuclease.

## References

1. X. Yang, F. Pu, J. Ren and X. Qu, *Chem. Commun.*, 2011, **47**, 8133-8135.
2. M. Wang, D. Zhang, G. Zhang, Y. Tang, S. Wang and D. Zhu, *Anal. Chem.*, 2008, **80**, 6443-6448.
3. J. J. Li, R. Geyer and W. Tan, *Nucleic Acids Res.*, 2000, **28**, e52.
4. F. Pu, D. Hu, J. Ren, S. Wang and X. Qu, *Langmuir*, 2009, **26**, 4540-4545.
5. Y. Xiao, F. Shu, K.-Y. Wong and Z. Liu, *Anal. Chem.*, 2013, **85**, 8493-8497.
6. R. Hu, Y.-R. Liu, R.-M. Kong, M. J. Donovan, X.-B. Zhang, W. Tan, G.-L. Shen and R.-Q. Yu, *Biosens. Bioelectron.*, 2013, **42**, 31-35.
7. X. Tian, X.-J. Kong, Z.-M. Zhu, T.-T. Chen and X. Chu, *Talanta*, 2015, **131**, 116-120.
